# Supplementary figures and images for: The MAP kinase pathway coordinates crossover designation with disassembly of synaptonemal complex proteins during meiosis
Source: eLife journal article supplement (doi:10.7554/elife.12039), 2016-02-27

Figure 5—figure supplement 4

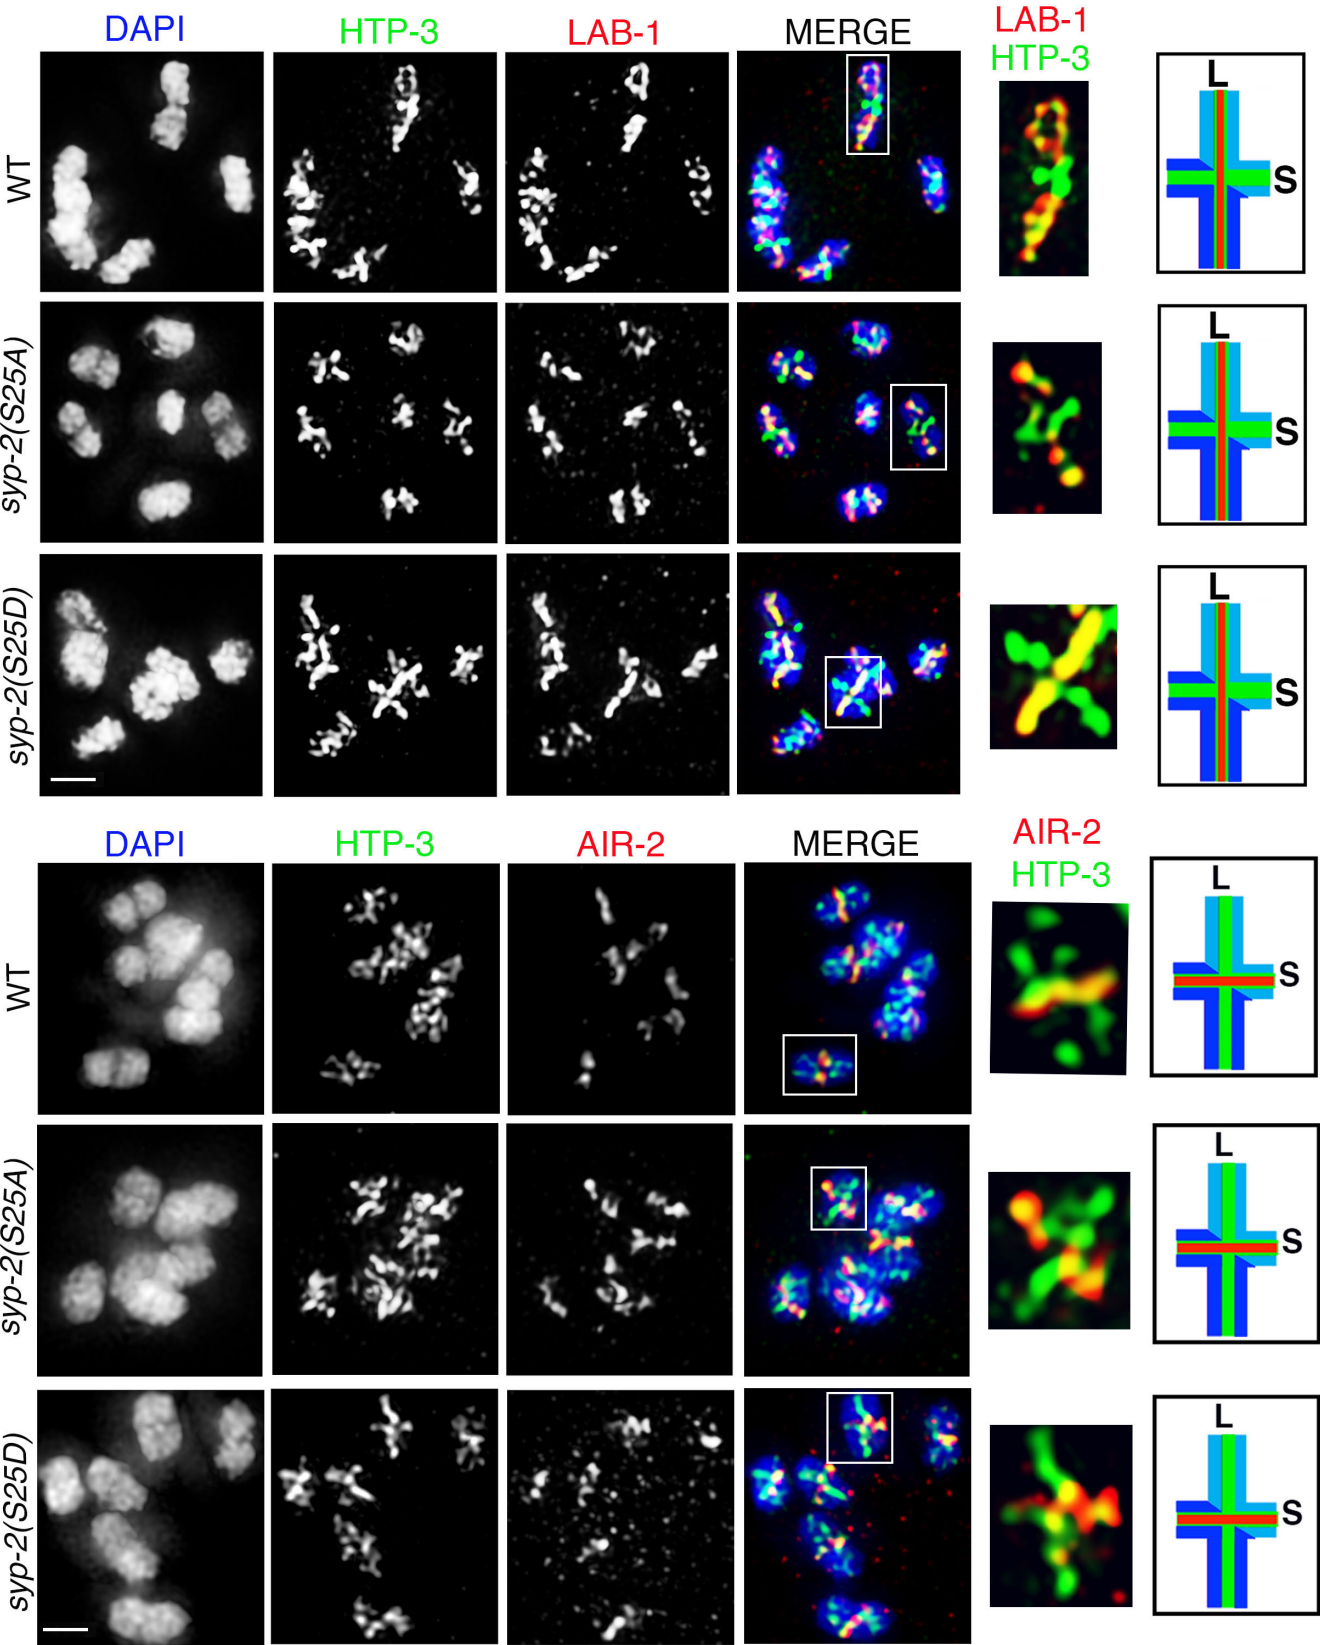

Supplement: supp [file elife-12039-supp-v1.zip]

Figure 2–figure supplement 5

A

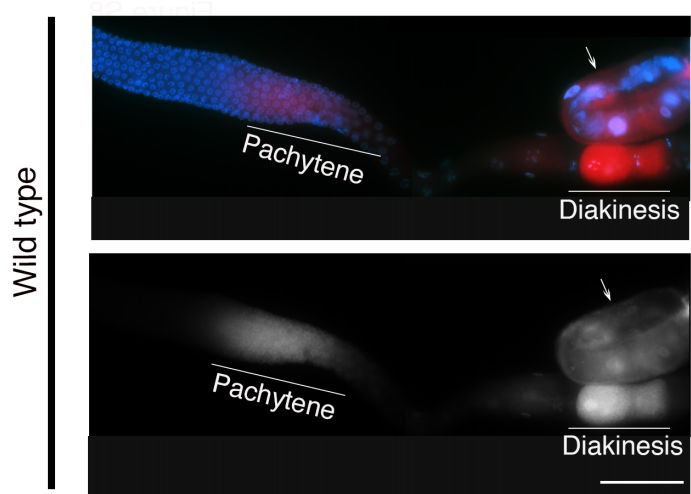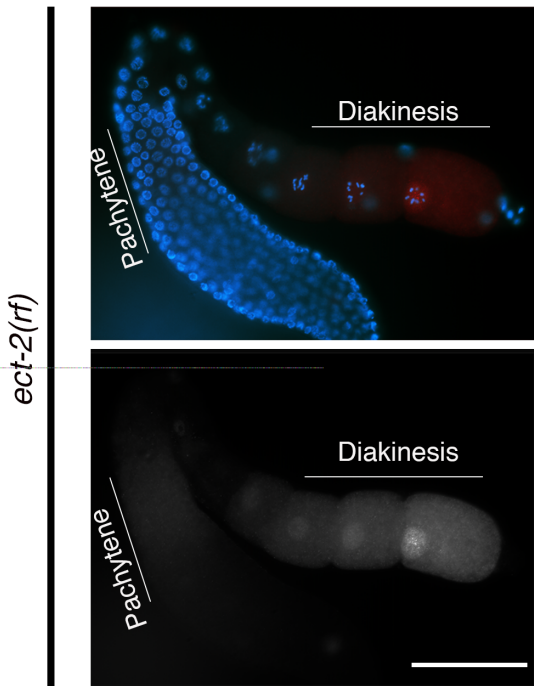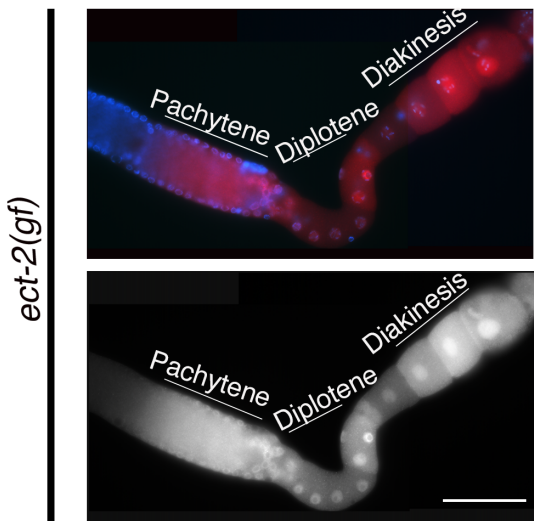

B

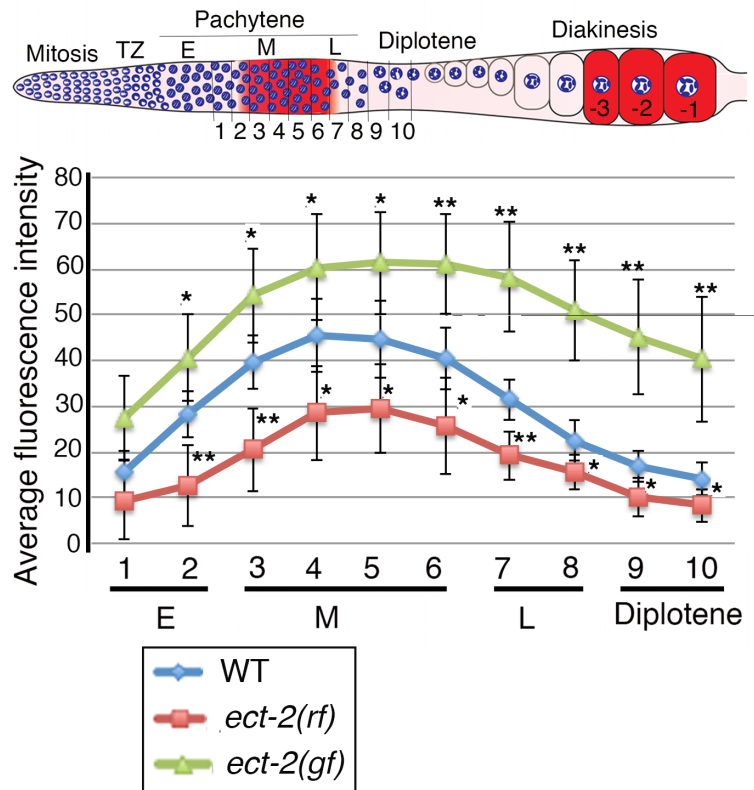

Supplement: supp [file elife-12039-supp-v1.zip]

Figure 2–figure supplement 4

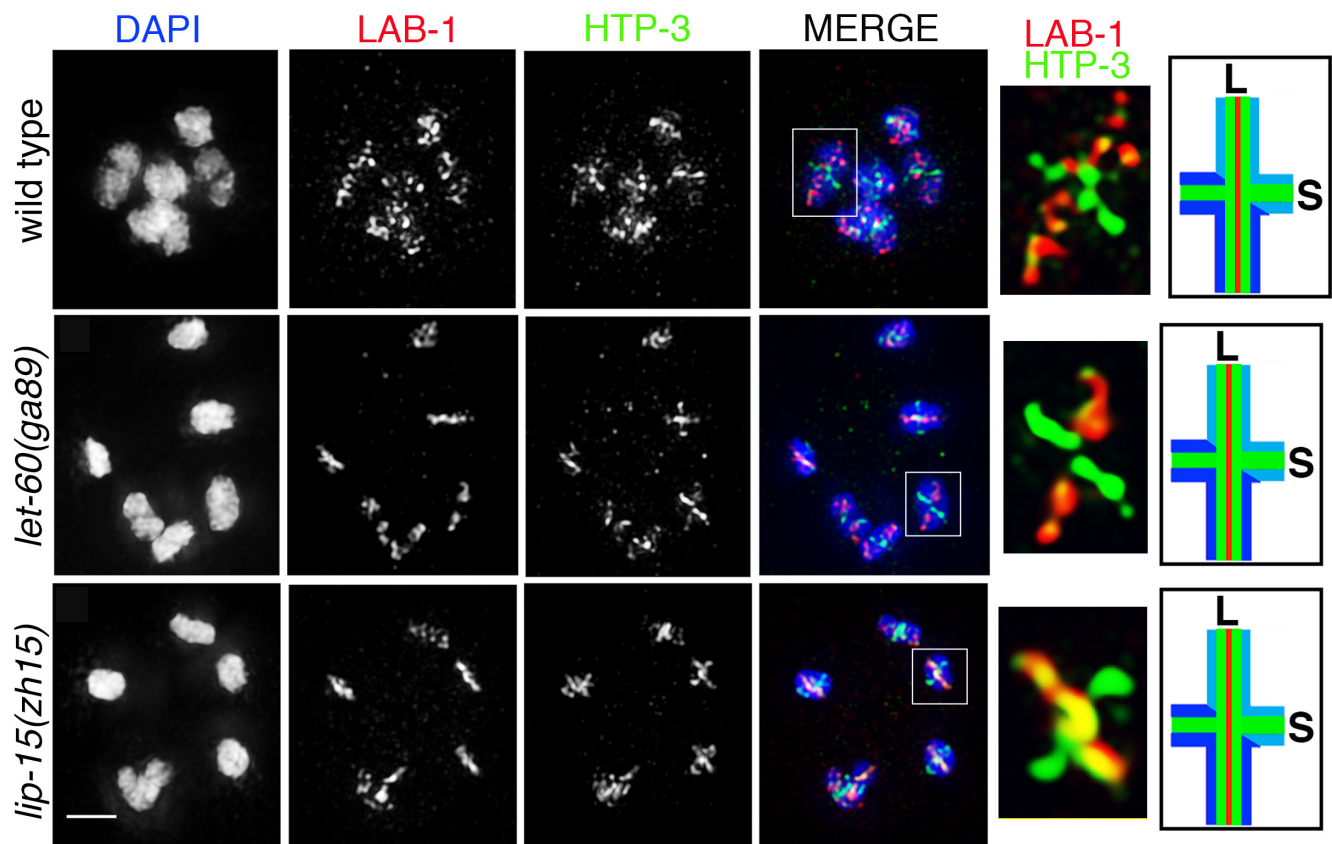

Supplement: supp [file elife-12039-supp-v1.zip]

Figure 1–figure supplement 2

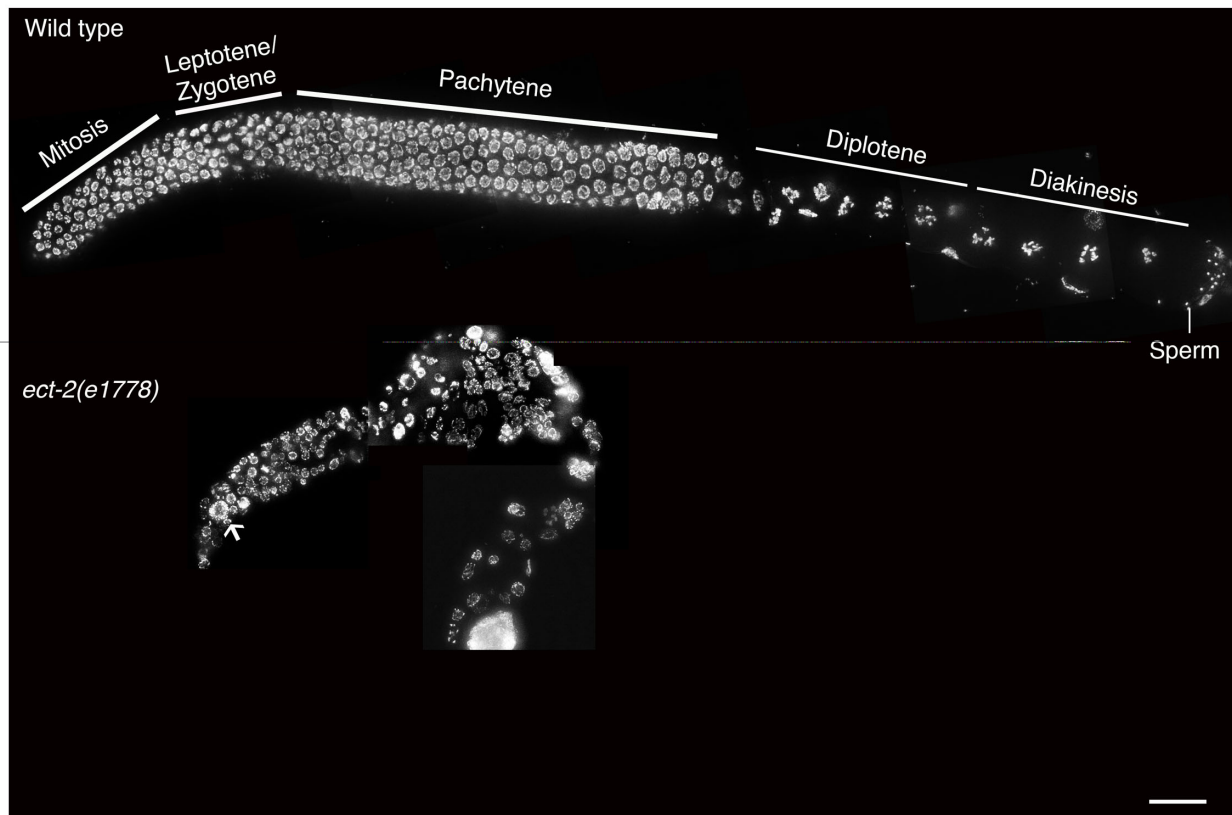

Supplement: supp [file elife-12039-supp-v1.zip]

Figure 2—figure supplement 3

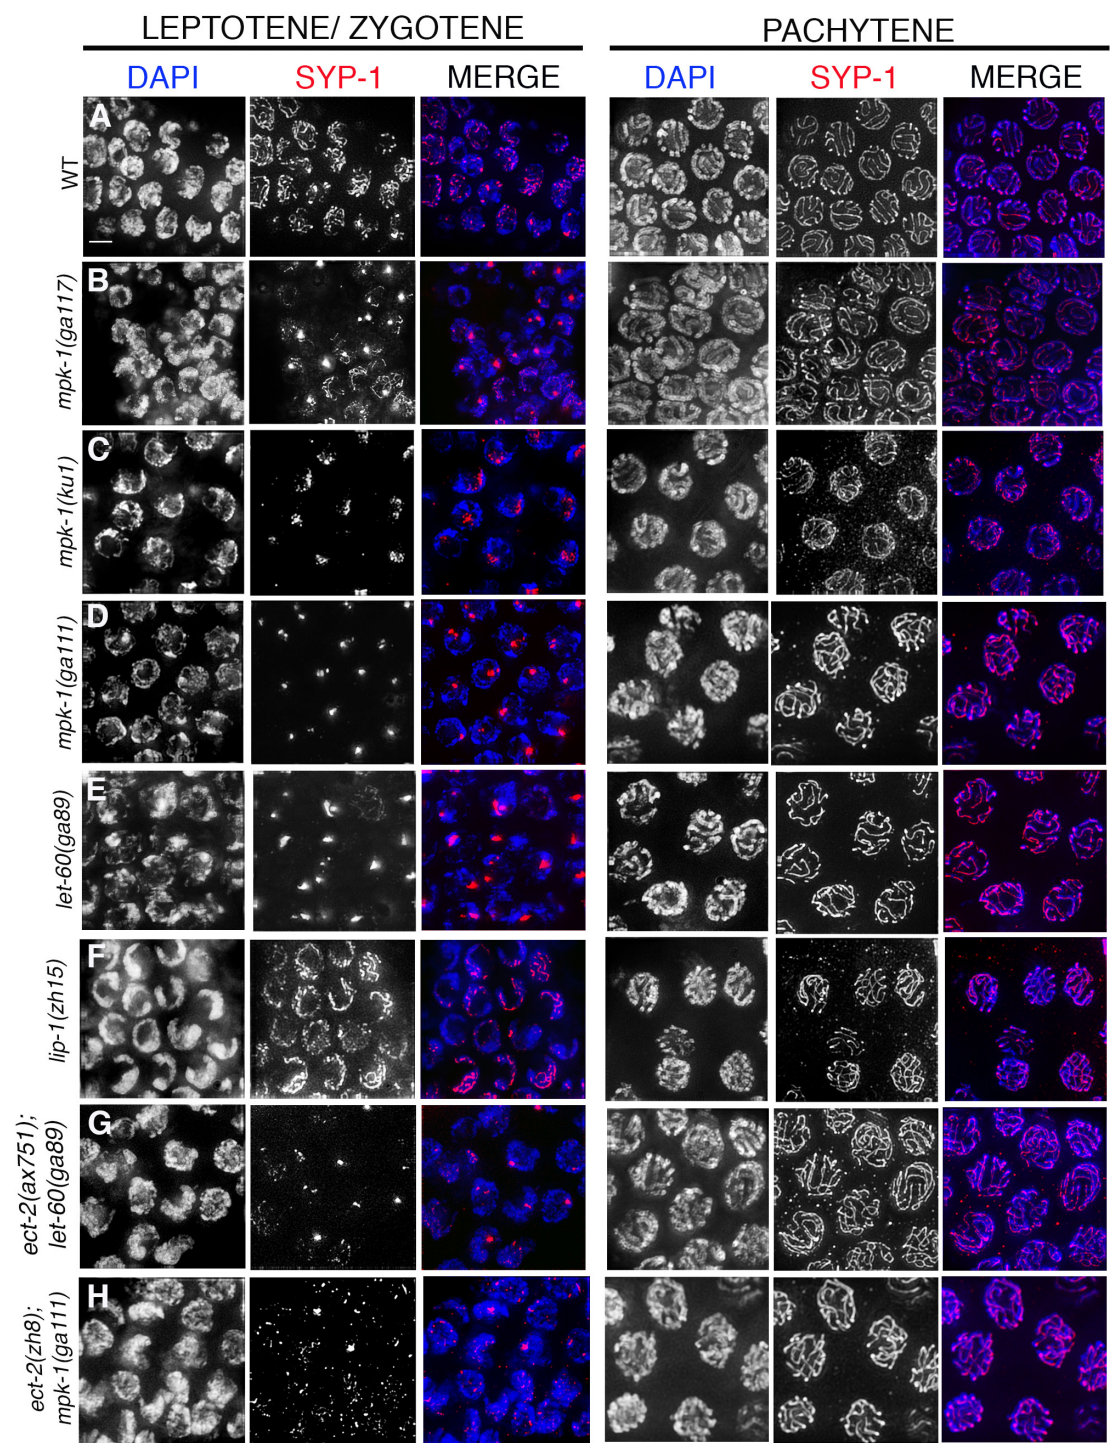

Supplement: supp [file elife-12039-supp-v1.zip]

Figure 1–figure supplement 1

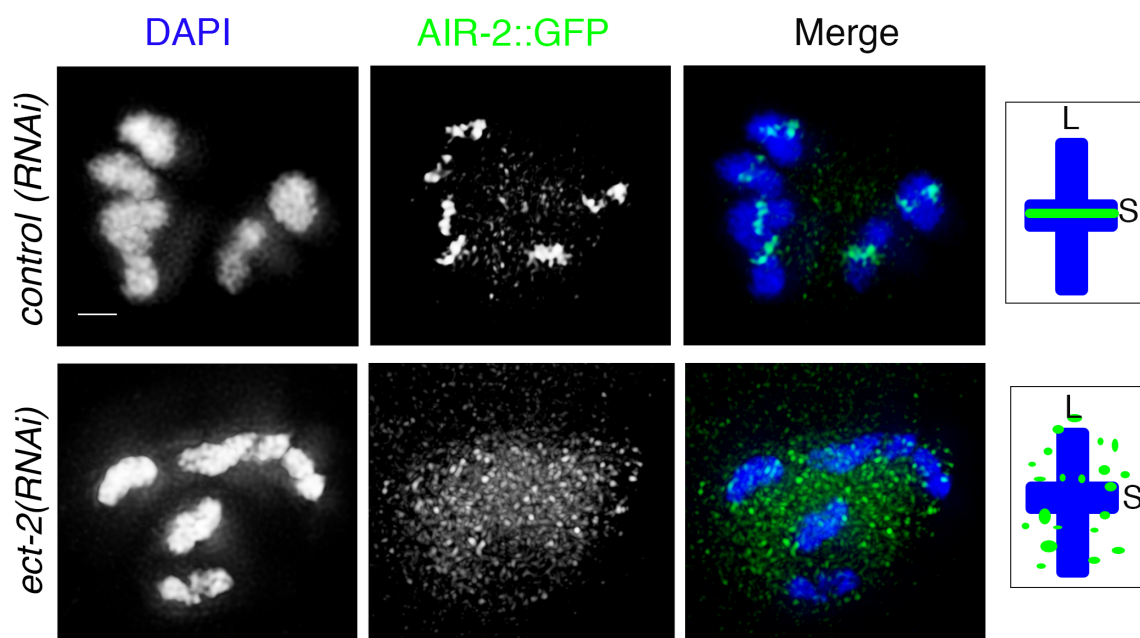

Supplement: supp [file elife-12039-supp-v1.zip]

Figure 2—figure supplement 6

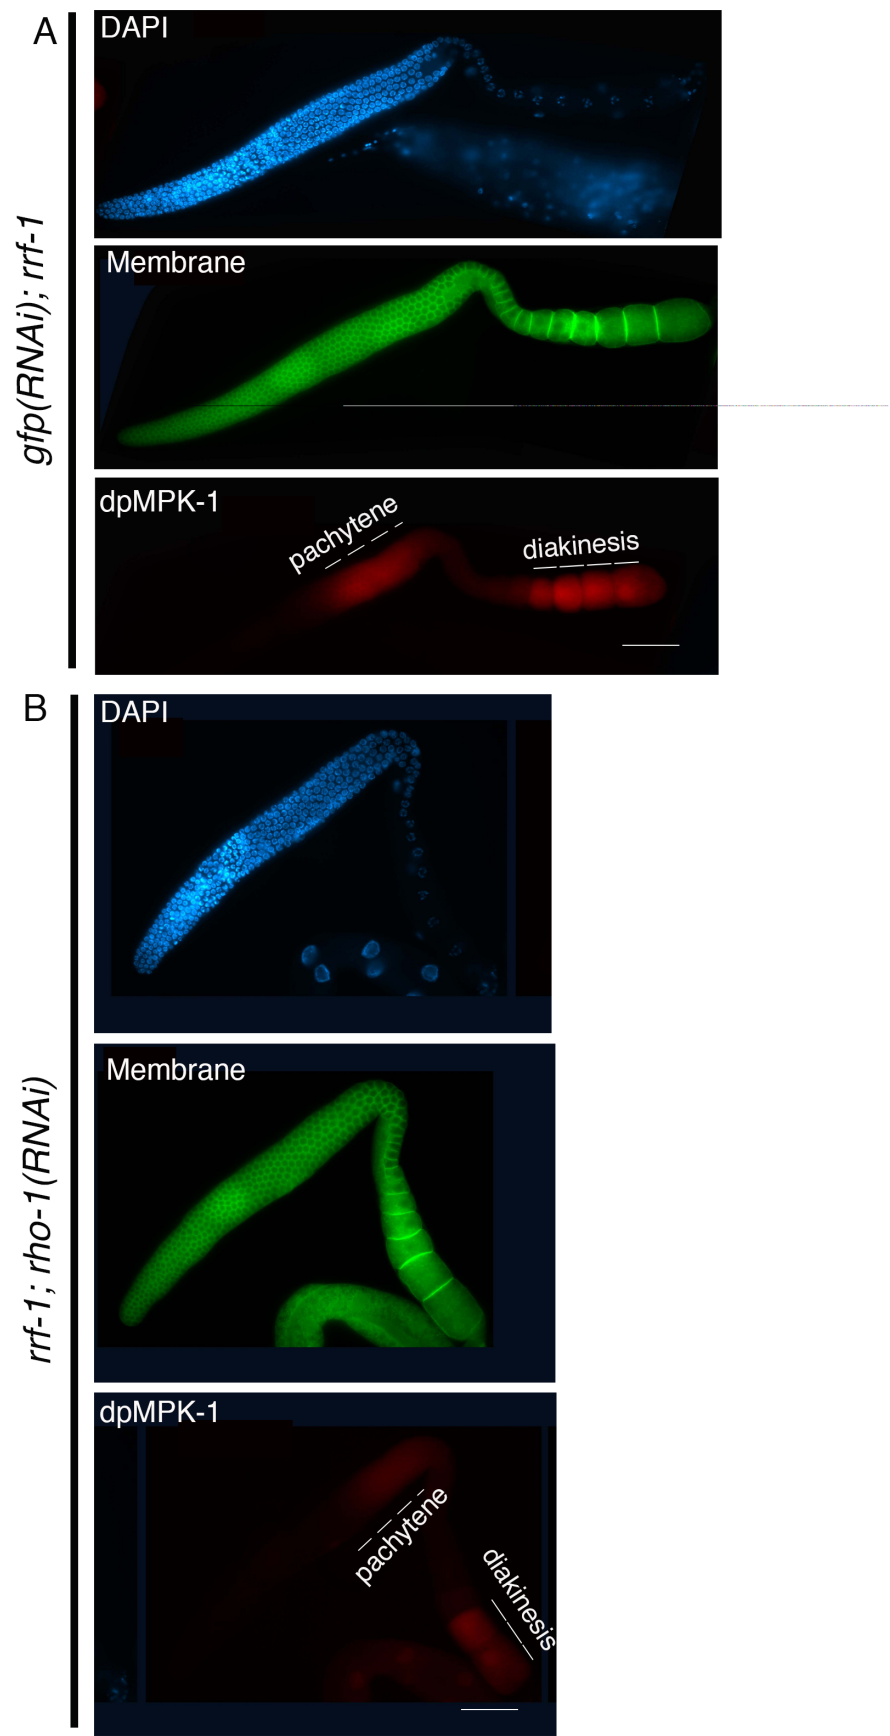

Supplement: supp [file elife-12039-supp-v1.zip]

Figure 1–figure supplement 4

Wild type expressing ECT-2::GFP

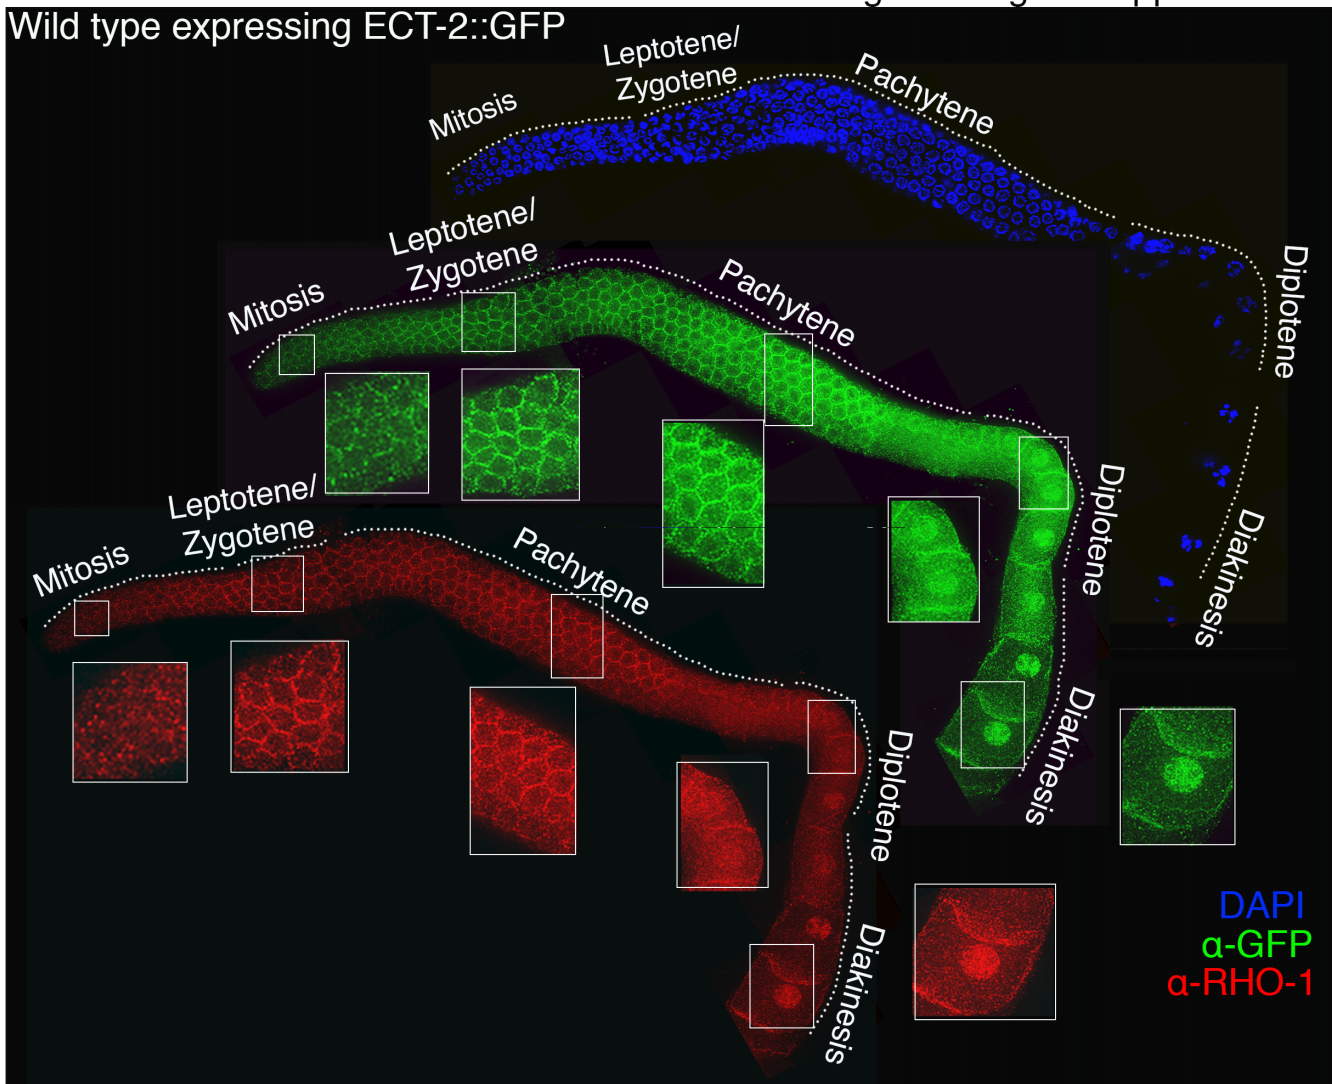

Wild type without ECT-2::GFP

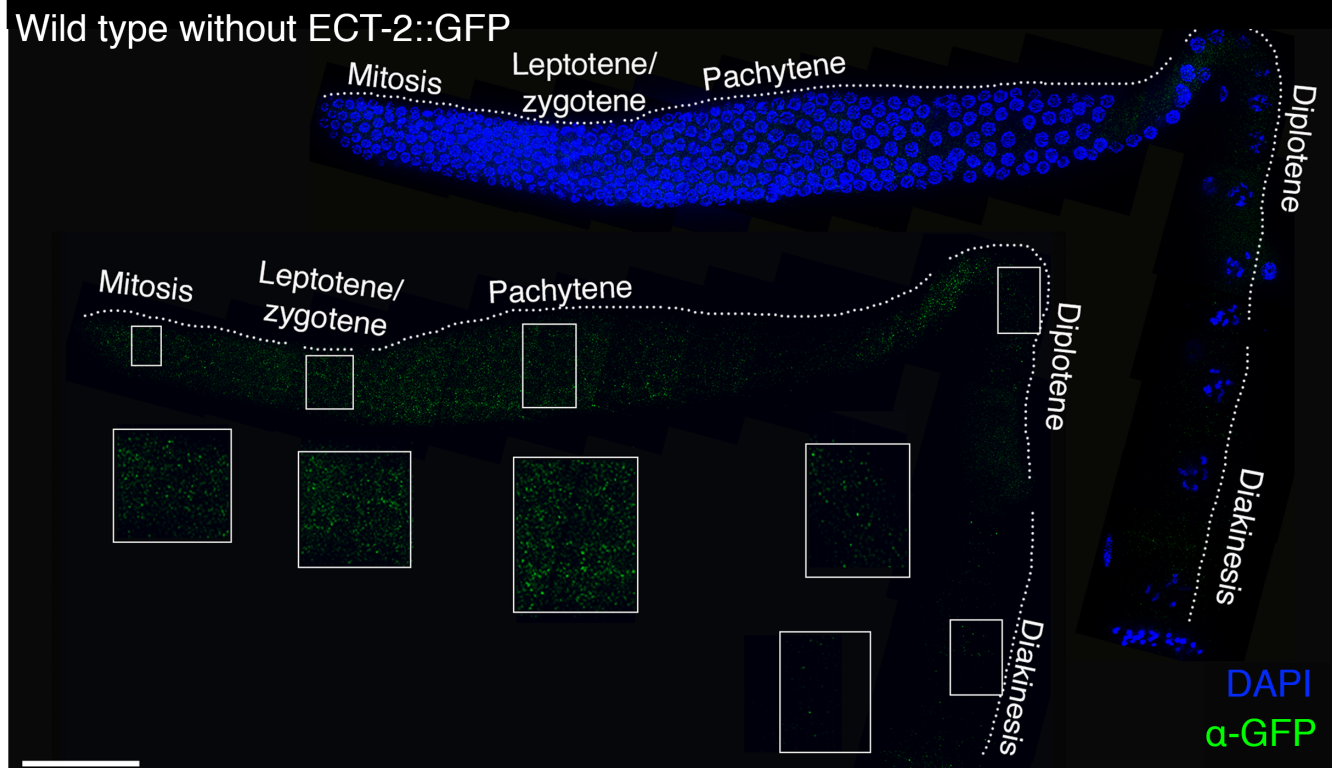

Supplement: supp [file elife-12039-supp-v1.zip]

Figure 7—figure supplement 1

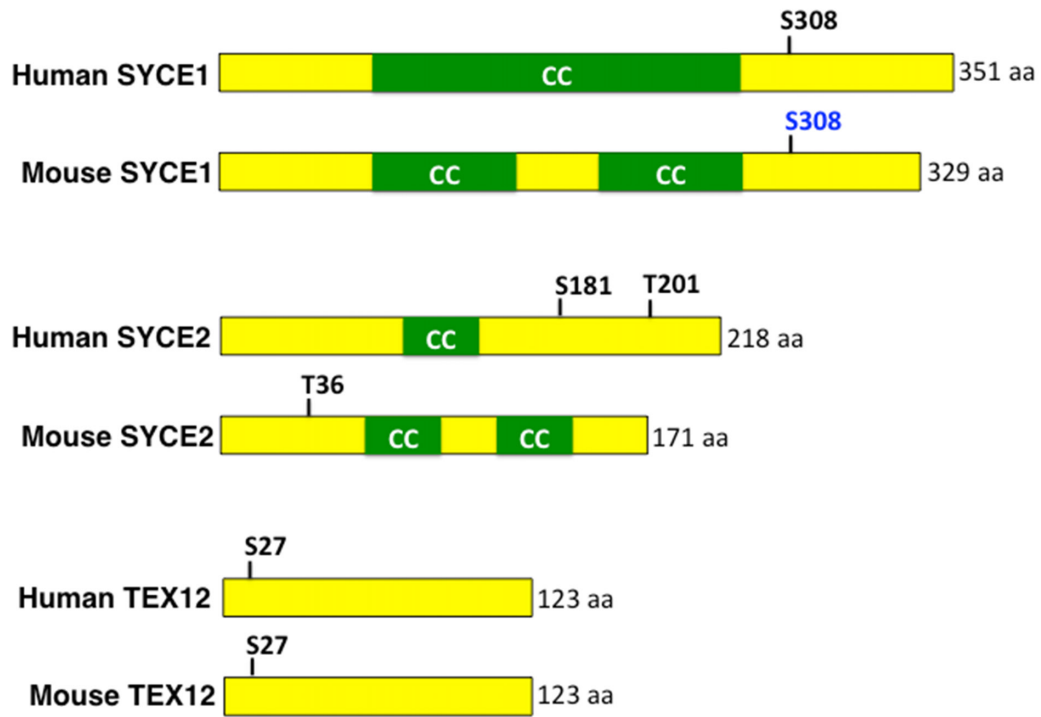

Supplement: supp [file elife-12039-supp-v1.zip]

Figure 2–figure supplement 1

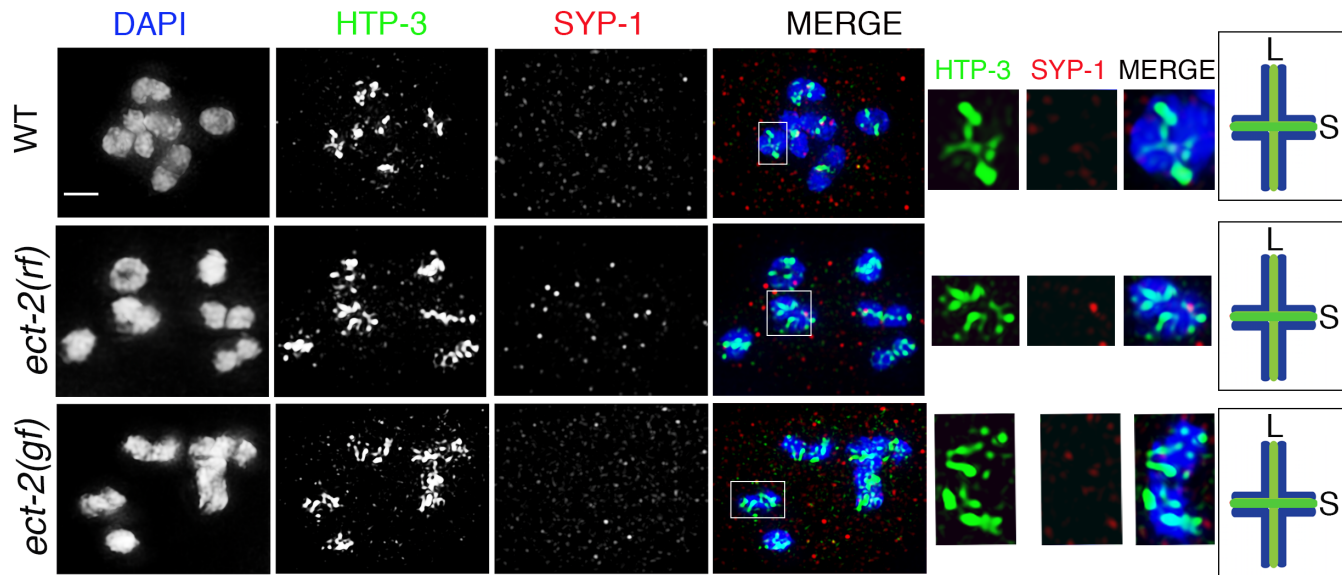

Supplement: supp [file elife-12039-supp-v1.zip]

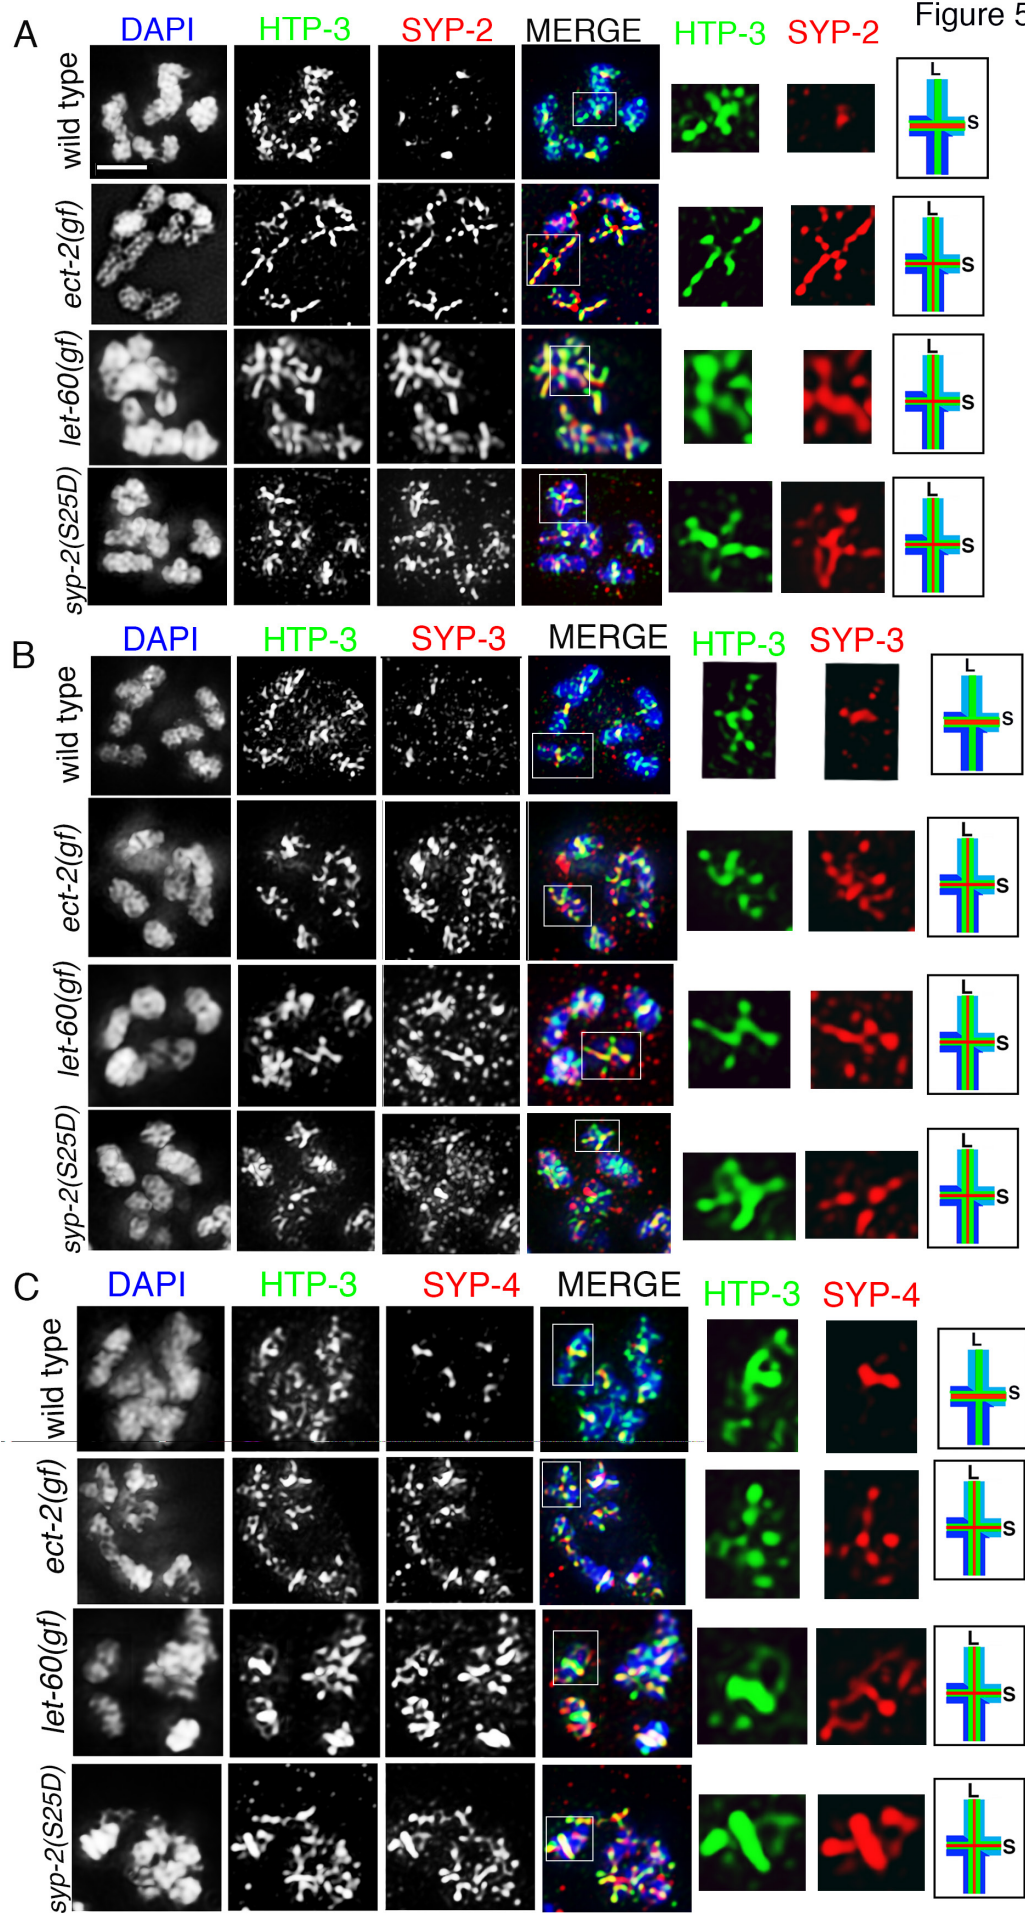

Supplement: supp [file elife-12039-supp-v1.zip]

Figure 5—figure supplement 1

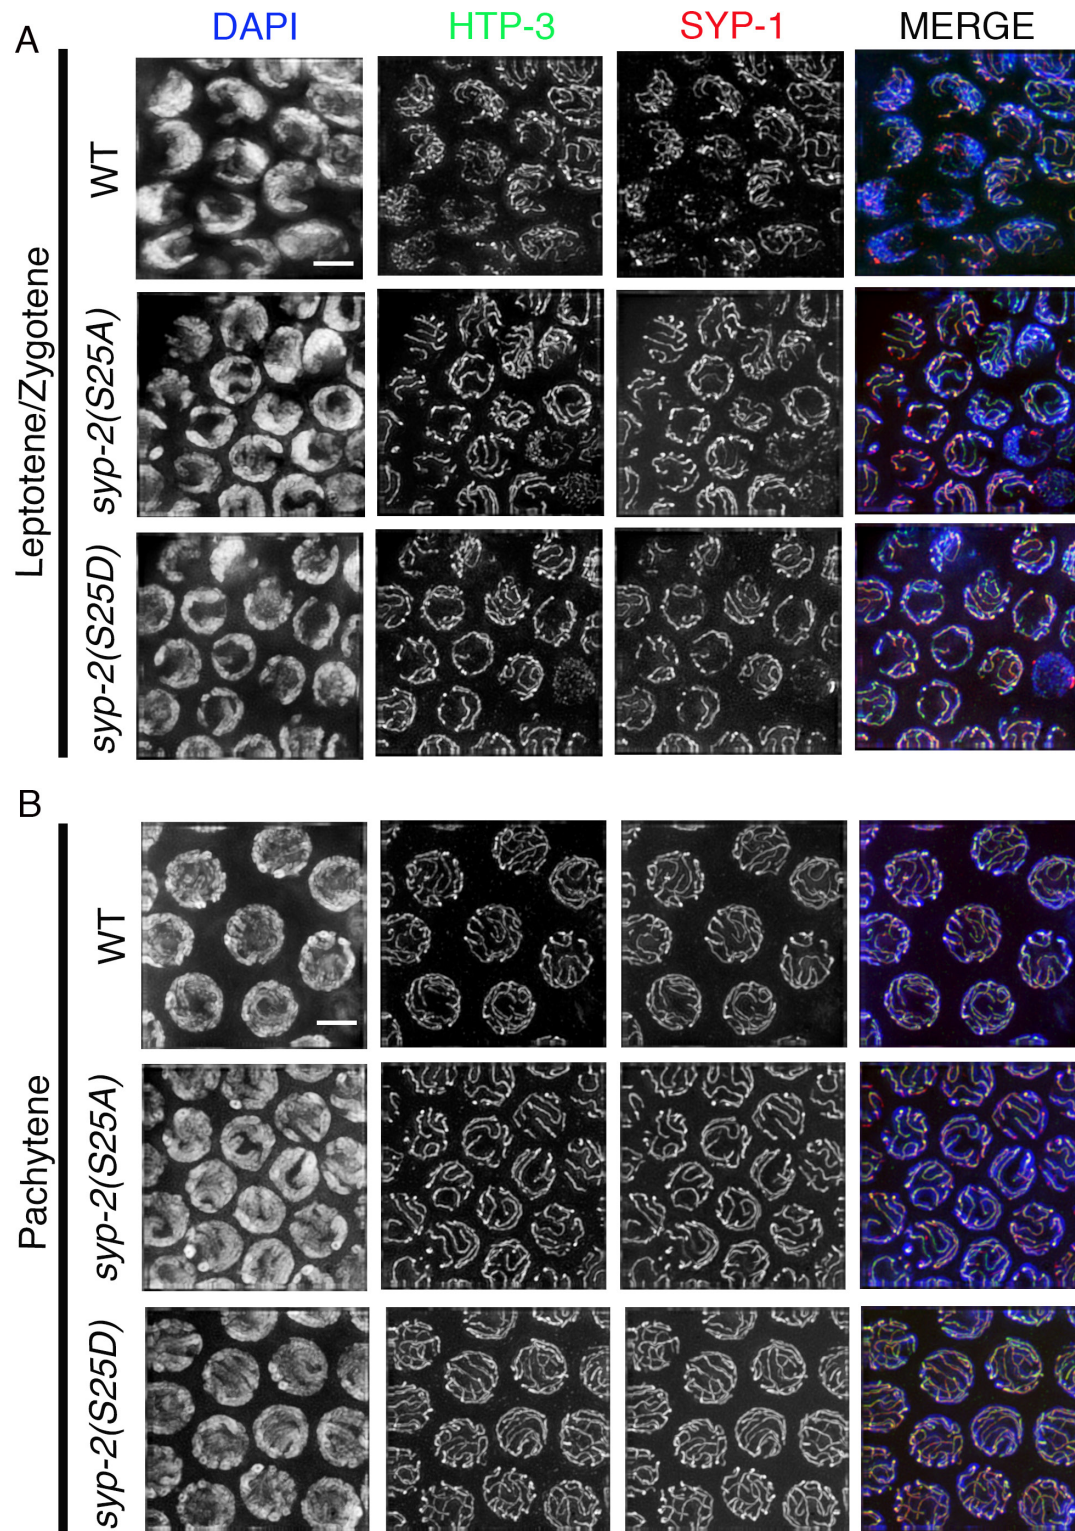

Supplement: supp [file elife-12039-supp-v1.zip]

Figure 4 figure supplement 1

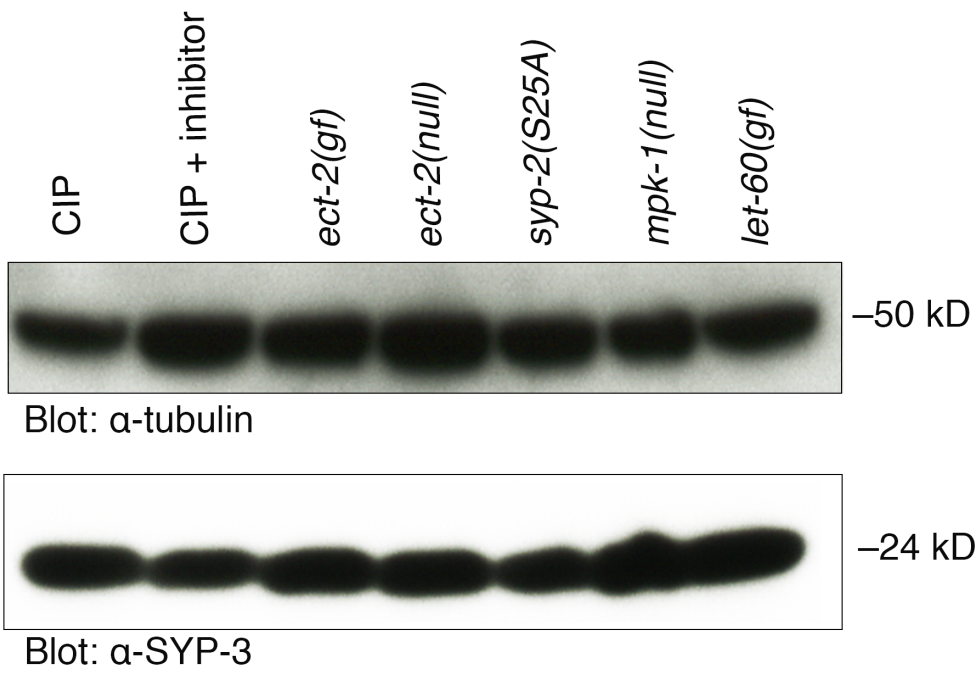

Supplement: supp [file elife-12039-supp-v1.zip]

Figure 1–figure supplement 3

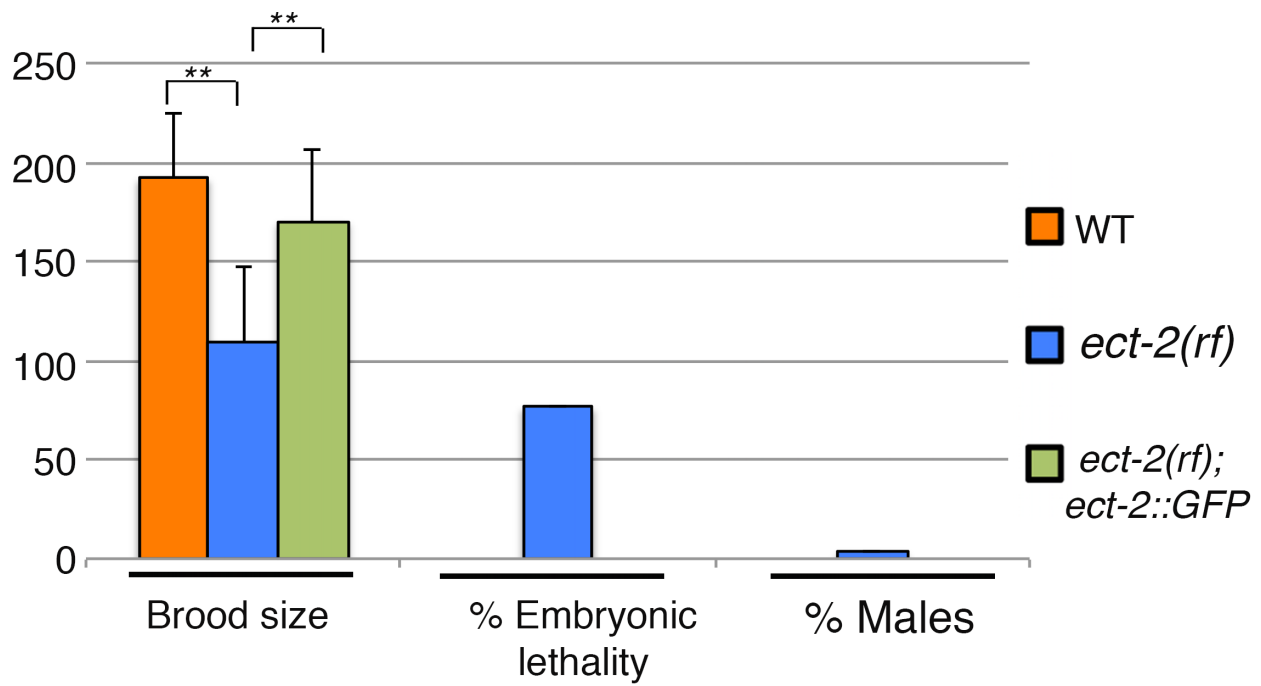

Supplement: supp [file elife-12039-supp-v1.zip]

Figure 2–figure supplement 2

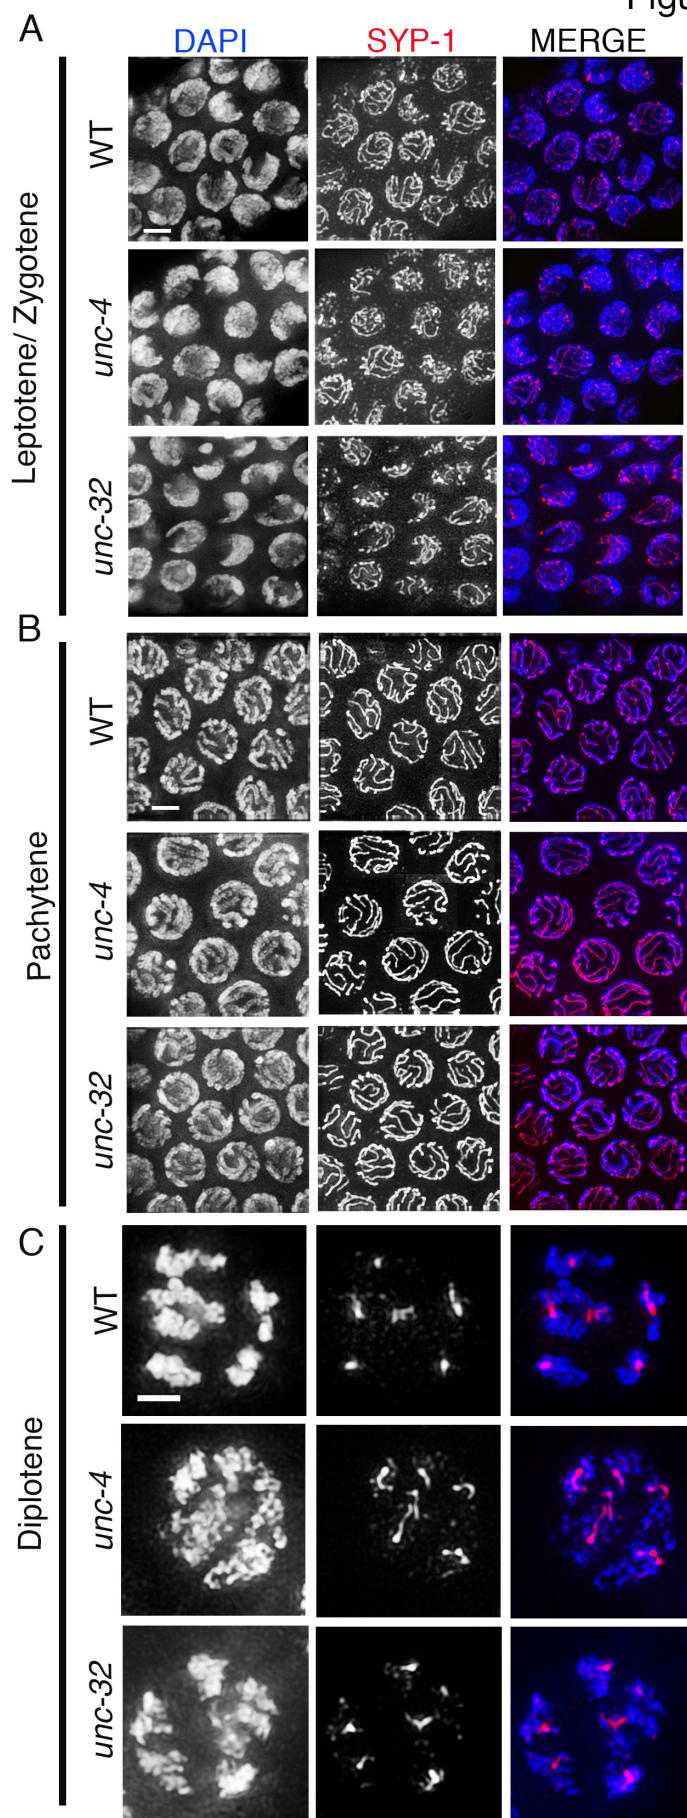

Supplement: supp [file elife-12039-supp-v1.zip]

Figure 5—figure supplement 3

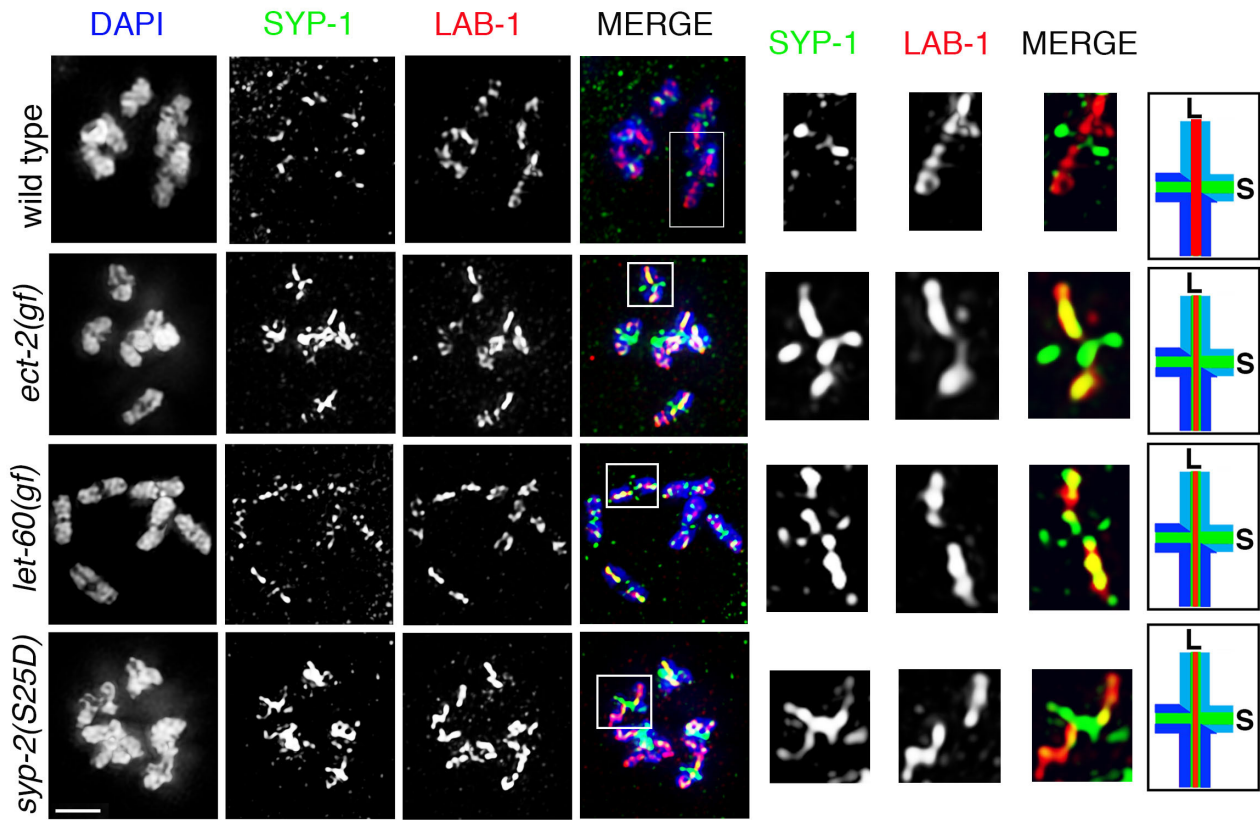

Supplement: supp [file elife-12039-supp-v1.zip]
